# Supplementary material for: N-Terminal Pro-Brain Natriuretic Peptide Is a Useful Prognostic Marker in Patients with Pre-Capillary Pulmonary Hypertension and Renal Insufficiency
Source: PubMed Central journal article supplement (PMC3994009; doi:10.1371/journal.pone.0094263), 2014-04-21
Supplement: pone.0094263.s001.pdf [file pone.0094263.s001.pdf]

**Figure S1**

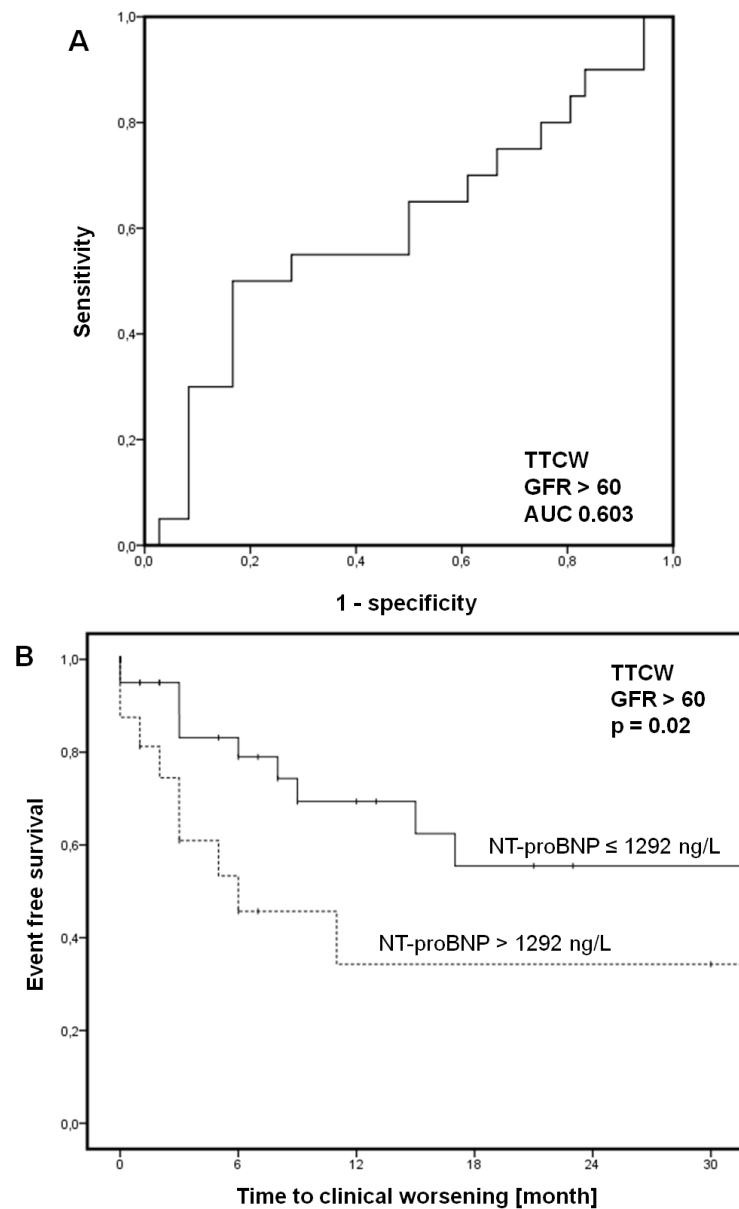

**Figure S1 Time to clinical worsening (TTCW):** Receiver operating characteristic (ROC) analysis to determine the cut-off value in patients with preserved renal function (defined as glomerular filtration rate (GFR) > 60 ml/min/1.73 m<sup>2</sup>; **A**). In Kaplan-Meier analysis, higher levels of n-terminal pro-brain natriuretic peptide (NT-proBNP) were significantly associated with early clinical worsening (**B**).
