# Supplementary material for: N-Terminal Pro-Brain Natriuretic Peptide Is a Useful Prognostic Marker in Patients with Pre-Capillary Pulmonary Hypertension and Renal Insufficiency
Source: PubMed Central journal article supplement (PMC3994009; doi:10.1371/journal.pone.0094263), 2014-04-21
Supplement: pone.0094263.s002.pdf [file pone.0094263.s002.pdf]

**Table S1** Patients' PAH-specific medication at time of right heart catheterization.

| <b>Medication</b>                                           | <b>All patients</b> | <b>PAH</b>  | <b>CTEPH</b> |
|-------------------------------------------------------------|---------------------|-------------|--------------|
| <b>Patients with GFR &gt;60 [ml/min/1.73 m<sup>2</sup>]</b> |                     |             |              |
| Oral endothelin receptor antagonists                        | 33/56 (59%)         | 25/38 (66%) | 8/17 (47%)   |
| Oral phosphodiesterase type 5 inhibitors                    | 24/56 (43%)         | 22/38 (58%) | 6/17 (35%)   |
| Inhaled prostacyclin                                        | 9/56 (16%)          | 9/38 (24%)  | -            |
| <b>Patients with GFR ≤60 [ml/min/1.73 m<sup>2</sup>]</b>    |                     |             |              |
| Oral endothelin receptor antagonists                        | 30/40 (75%)         | 22/31 (71%) | 2/8 (25%)    |
| Oral phosphodiesterase type 5 inhibitors                    | 33/40 (83%)         | 30/31 (65%) | 3/8 (38%)    |
| Inhaled prostacyclin                                        | 8/40 (20%)          | 8/31 (26%)  | -            |
