# Supplementary material for: N-Terminal Pro-Brain Natriuretic Peptide Is a Useful Prognostic Marker in Patients with Pre-Capillary Pulmonary Hypertension and Renal Insufficiency
Source: PubMed Central journal article supplement (PMC3994009; doi:10.1371/journal.pone.0094263), 2014-04-21
Supplement: pone.0094263.s003.pdf [file pone.0094263.s003.pdf]

**Table S2** Correlation of n-terminal pro-brain natriuretic peptide (NT-proBNP) with hemodynamic parameters in PH patients with and without renal insufficiency.

| <b>Parameters</b>                                                  | <b>NT-proBNP<br/>[ng/L]</b> | <b>Normalized NT-<br/>proBNP ratio</b> |
|--------------------------------------------------------------------|-----------------------------|----------------------------------------|
| <b>Patients with GFR &gt;60 [ml/min/1.73 m<sup>2</sup>] (n=56)</b> |                             |                                        |
| Mean PAP [mm Hg]                                                   | 0.454; <0.001               | 0.404; 0.002                           |
| RAP [mm Hg]                                                        | 0.244; 0.2                  | 0.245; 0.2                             |
| PVR [dyne*s*cm <sup>5</sup> ]                                      | 0.513; <0.001               | 0.474; <0.001                          |
| CI [L/min*m <sup>2</sup> ]                                         | -0.370; 0.006               | -0.386; 0.004                          |
| <b>Patients with GFR ≤60 [ml/min/1.73 m<sup>2</sup>] (n=40)</b>    |                             |                                        |
| Mean PAP [mm Hg]                                                   | -0.057; 0.74                | 0.006; 0.97                            |
| RAP [mm Hg]                                                        | 0.410; 0.016                | 0.385; 0.018                           |
| PVR [dyne*s*cm <sup>5</sup> ]                                      | 0.343; 0.044                | 0.318; 0.052                           |
| CI [L/min*m <sup>2</sup> ]                                         | -0.457; 0.009               | -0.452; 0.007                          |

Data are presented as R-value; p-value of Spearman's rank correlation.
